# Supplementary material
Source: Springer Nature journal article supplement (https://www.springermedizin.de/resource/supplementary/12933_2002_3_MOESM5_ESM.pdf/9538100)
Supplement: MOESM5 [file 9538100]

# VULNERABLE - HOT PLAQUES: PLAQUES “ON FIRE”

Double Jeopardy : T2DM and ATHEROSCLEROPATHY.

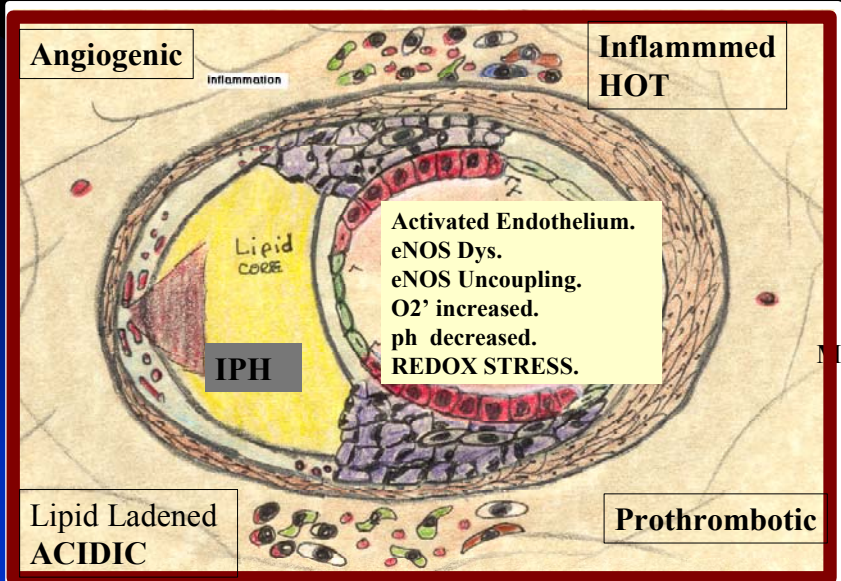

7/26/02

**REDOX STRESS**

70
